# Supplementary material
Source: PubMed Central journal article supplement (PMC6003237)

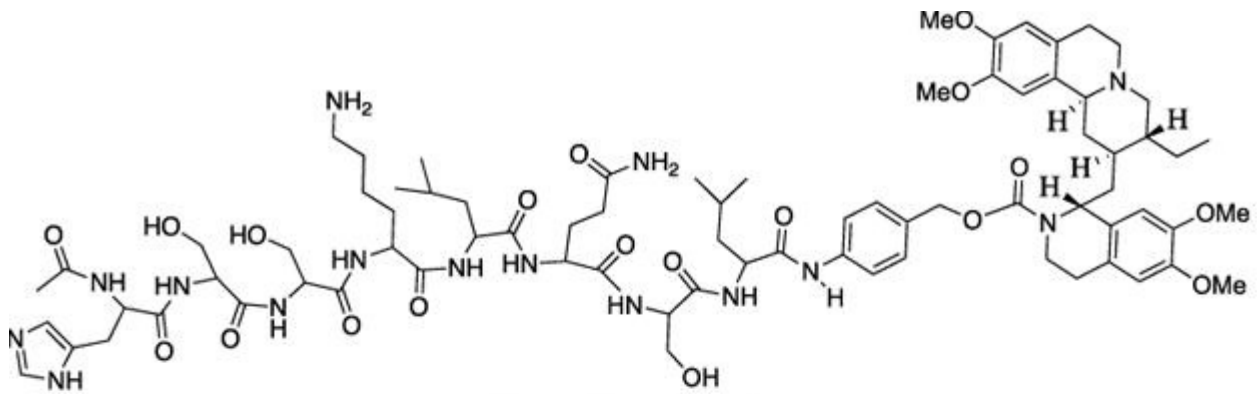

**Emetine Prodrug**  
 (Cytotoxicity switch is turned "OFF")

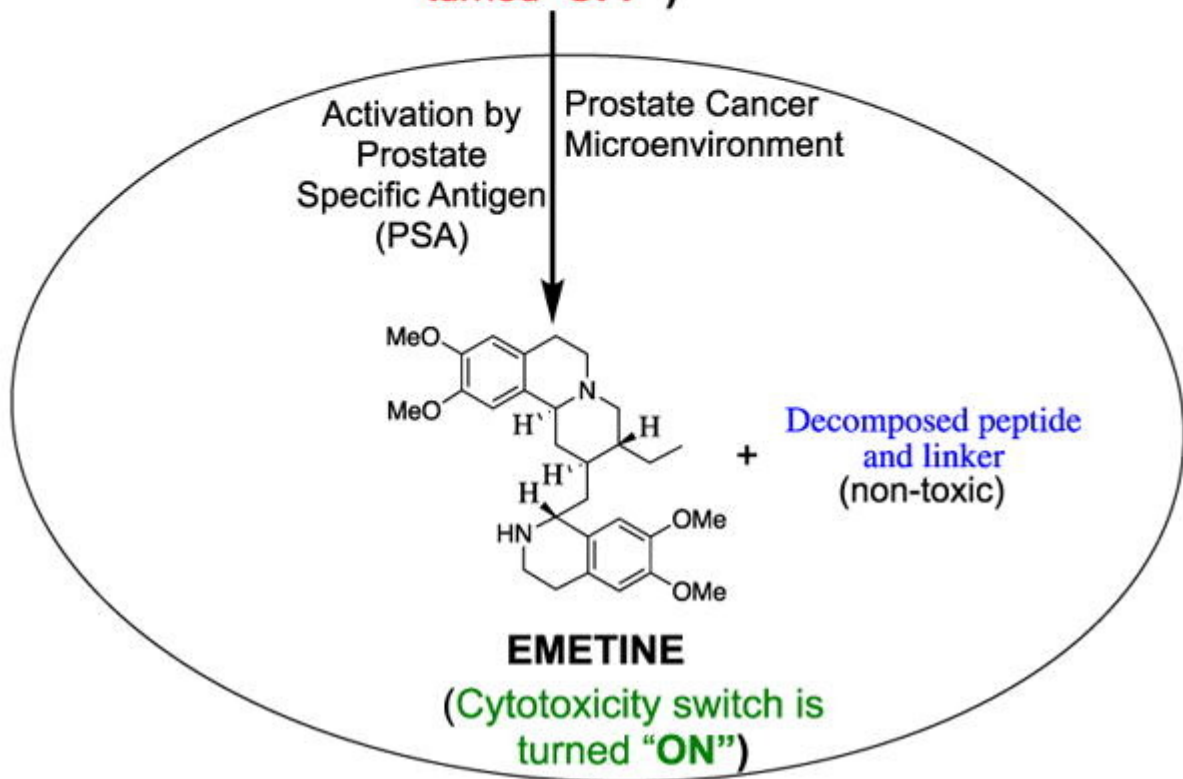

Supplement: NIHMS972634-supplement-Suppl_Figure.pdf [file NIHMS972634-supplement-Suppl_Figure.pdf]
